# Supplementary material for: Organ-Specific Metabolic Shifts of Flavonoids in Scutellaria baicalensis at Different Growth and Development Stages
Source: MDPI journal article supplement (doi:10.3390/molecules23020428), 2018-02-15
Supplement: s1 [file s1]

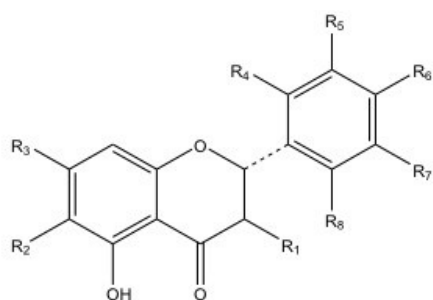

Flavananol

| No. | R1   | R2   | R3   | R4 | R5   | R6 | R7 | R8 |
|-----|------|------|------|----|------|----|----|----|
| 1   | OH   | H    | OH   | H  | Oglu | OH | OH | H  |
| 3   | OH   | H    | Oglu | H  | OH   | OH | H  | H  |
| 8   | Oglu | OCH3 | OH   | H  | H    | OH | H  | H  |
| 9   | OH   | H    | OH   | H  | OH   | OH | OH | H  |
| 12  | OH   | H    | OH   | OH | H    | H  | H  | OH |

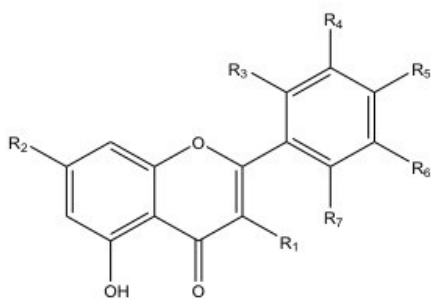

Flavonol

| No. | R1    | R2    | R3 | R4 | R5        | R6 | R7 |
|-----|-------|-------|----|----|-----------|----|----|
| 10  | Ogal  | OH    | H  | OH | OH        | OH | H  |
| 15  | OH    | OH    | H  | H  | Oglu-Oglu | OH | H  |
| 19  | Oglu  | OH    | H  | H  | OH        | H  | H  |
| 34  | OgluA | OH    | H  | H  | OH        | H  | H  |
| 46  | OH    | OH    | H  | OH | OH        | OH | H  |
| 66  | OH    | OgluA | OH | H  | H         | H  | OH |

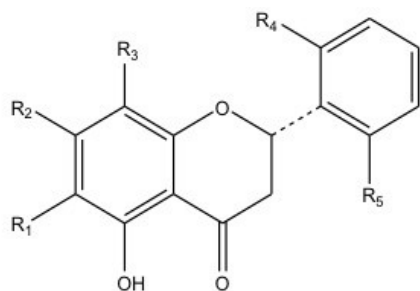

Flavanone without 4'-OH

| No. | R1   | R2    | R3   | R4   | R5 |
|-----|------|-------|------|------|----|
| 20  | H    | OH    | H    | Oglu | OH |
| 49  | OCH3 | OgluA | H    | OH   | H  |
| 50  | H    | OgluA | OCH3 | OH   | H  |
| 62  | OH   | OH    | H    | H    | H  |
| 78  | H    | OgluA | H    | H    | H  |
| 79  | H    | OgluA | OCH3 | OCH3 | H  |
| 88  | H    | OH    | OH   | H    | H  |
| 96  | H    | OH    | H    | H    | H  |

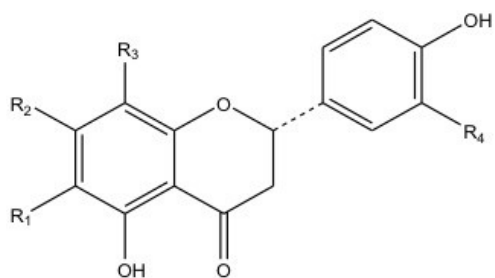

Flavanone with 4'-OH

| NO. | R1 | R2    | R3   | R4 |
|-----|----|-------|------|----|
| 16  | OH | OgluA | H    | OH |
| 25  | OH | OgluA | H    | H  |
| 32  | H  | OgluA | OH   | H  |
| 41  | H  | OH    | OH   | H  |
| 43  | H  | OgluA | H    | H  |
| 44  | H  | OgluA | H    | OH |
| 45  | OH | OH    | H    | H  |
| 73  | H  | OH    | OCH3 | H  |

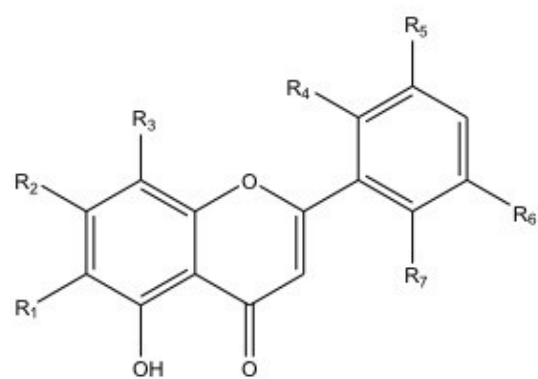

Flavone without 4'-OH

| No. | R1   | R2    | R3    | R4    | R5 | R6 | R7   |
|-----|------|-------|-------|-------|----|----|------|
| 11  | H    | OH    | H     | Oglu  | H  | H  | OH   |
| 24  | Ara  | H     | Glu   | H     | H  | H  | H    |
| 28  | H    | OH    | OCH3  | OCH3  | OH | H  | Oglu |
| 31  | Ara  | H     | Glu   | H     | H  | H  | H    |
| 33  | H    | CH3   | OCH3  | Oglu  | H  | H  | OH   |
| 35  | H    | H     | Glu   | H     | H  | H  | H    |
| 37  | OH   | Oglu  | OCH3  | H     | H  | H  | H    |
| 39  | OCH3 | CH3   | OCH3  | Oglu  | H  | H  | OH   |
| 40  | H    | H     | H     | OH    | H  | H  | OH   |
| 47  | OCH3 | OgluA | OH    | H     | H  | H  | H    |
| 54  | OCH3 | OCH3  | H     | OgluA | H  | H  | OH   |
| 55  | OH   | Oglu  | H     | H     | H  | H  | H    |
| 56  | OH   | OgluA | H     | H     | H  | H  | H    |
| 61  | OCH3 | OgluA | H     | OH    | H  | H  | H    |
| 65  | H    | OgluA | OH    | H     | H  | H  | H    |
| 67  | OCH3 | OgluA | H     | OH    | H  | H  | H    |
| 68  | H    | OH    | OgluA | H     | H  | H  | H    |

| No. | R1   | R2    | R3    | R4    | R5 | R6 | R7   |
|-----|------|-------|-------|-------|----|----|------|
| 11  | H    | OH    | H     | Oglu  | H  | H  | OH   |
| 24  | Ara  | H     | Glu   | H     | H  | H  | H    |
| 28  | H    | OH    | OCH3  | OCH3  | OH | H  | Oglu |
| 31  | Ara  | H     | Glu   | H     | H  | H  | H    |
| 33  | H    | CH3   | OCH3  | Oglu  | H  | H  | OH   |
| 35  | H    | H     | Glu   | H     | H  | H  | H    |
| 37  | OH   | Oglu  | OCH3  | H     | H  | H  | H    |
| 39  | OCH3 | CH3   | OCH3  | Oglu  | H  | H  | OH   |
| 40  | H    | H     | H     | OH    | H  | H  | OH   |
| 47  | OCH3 | OgluA | OH    | H     | H  | H  | H    |
| 54  | OCH3 | OCH3  | H     | OgluA | H  | H  | OH   |
| 55  | OH   | Oglu  | H     | H     | H  | H  | H    |
| 56  | OH   | OgluA | H     | H     | H  | H  | H    |
| 61  | OCH3 | OgluA | H     | OH    | H  | H  | H    |
| 65  | H    | OgluA | OH    | H     | H  | H  | H    |
| 67  | OCH3 | OgluA | H     | OH    | H  | H  | H    |
| 68  | H    | OH    | OgluA | H     | H  | H  | H    |

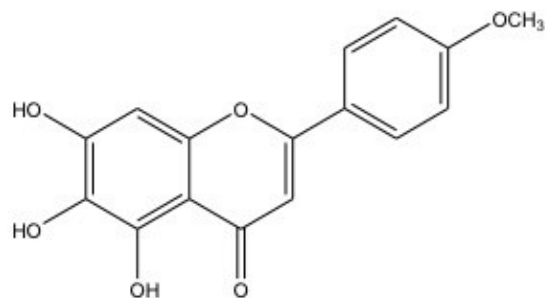

NO. 90 5,6,7-Trihydroxy-4'-methoxy flavone

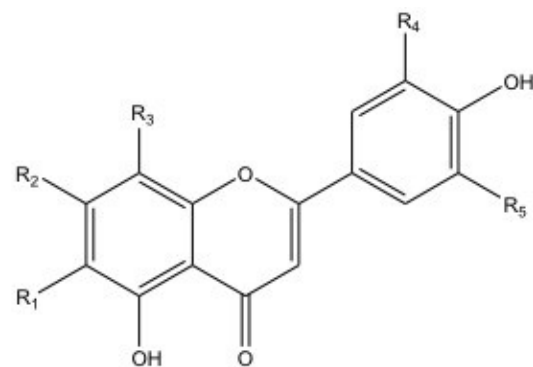

Flavone with 4'-OH

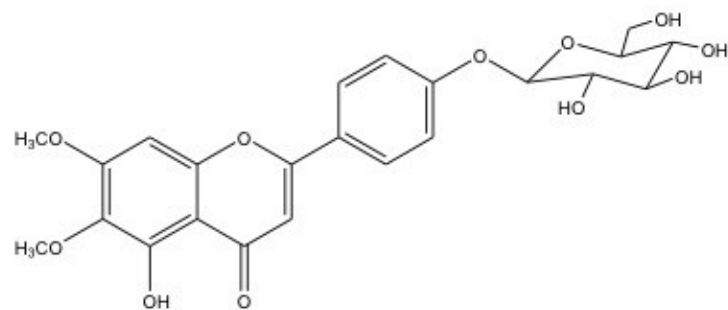

NO. 77 Cirsimaritin 4'-O-glucoside

| No. | R1   | R2    | R3    | R4 | R5 |
|-----|------|-------|-------|----|----|
| 17  | Oglu | OH    | Oara  | H  | H  |
| 18  | Oara | OH    | Oglu  | H  | H  |
| 21  | OH   | OgluA | H     | H  | OH |
| 26  | H    | OgluA | H     | H  | OH |
| 29  | OH   | OgluA | H     | H  | H  |
| 36  | H    | Oglu  | H     | H  | H  |
| 42  | H    | OgluA | H     | H  | H  |
| 48  | H    | OH    | OgluA | H  | H  |
| 52  | OH   | OCH3  | H     | OH | H  |
| 53  | OH   | OH    | H     | H  | H  |
| 58  | H    | OH    | OH    | H  | H  |
| 59  | H    | OgluA | OH    | H  | H  |
| 64  | OCH3 | OH    | H     | H  | H  |
| 75  | H    | OH    | H     | OH | H  |
| 82  | H    | OH    | H     | H  | H  |
| 85  | H    | OH    | OCH3  | H  | H  |

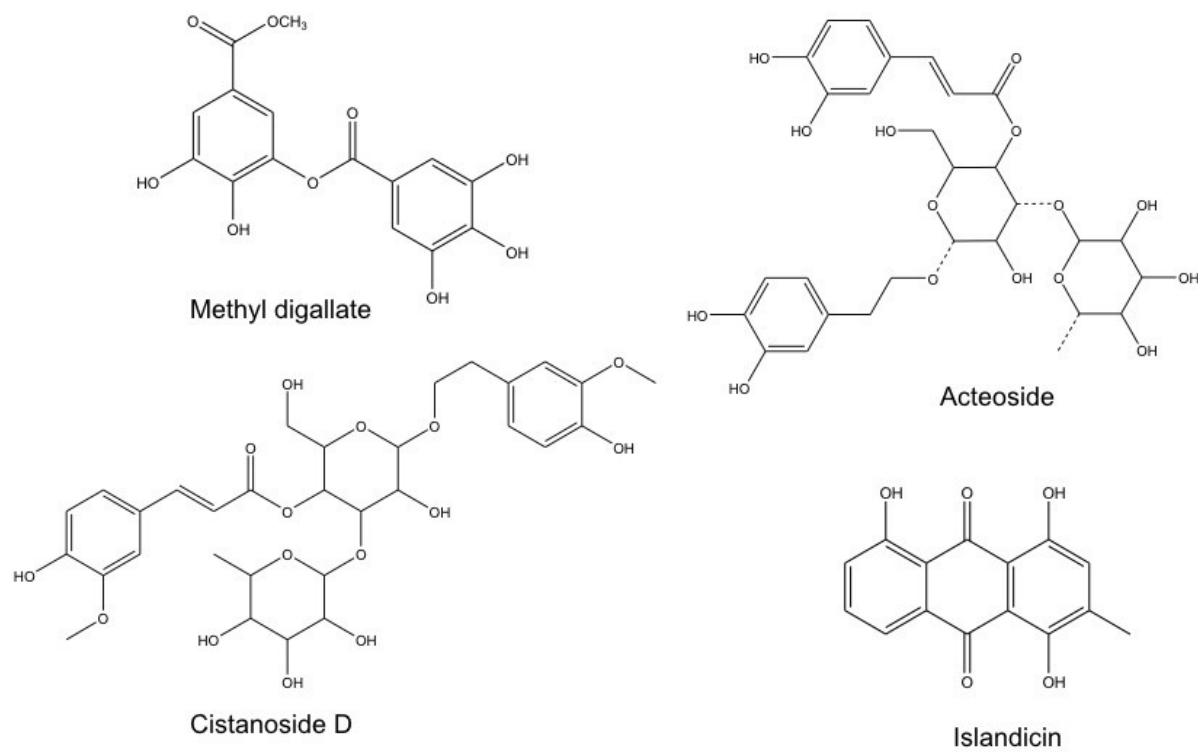

**Figure S1 The structures of the identified compounds in *S. baicalensis***

The No. of the compound is the same as it in Table 1.

glu = glucose, Ara = arabinose, glu A= glucuronic acid
